# Supplementary material for: mRNA COVID-19 vaccine elicits potent adaptive immune response without the persistent inflammation seen in SARS-CoV-2 infection
Source: bioRxiv or medRxiv preprint supplement (doi:10.1101/2021.04.20.21255677), 2023-08-23

# Supplemental Figure 1

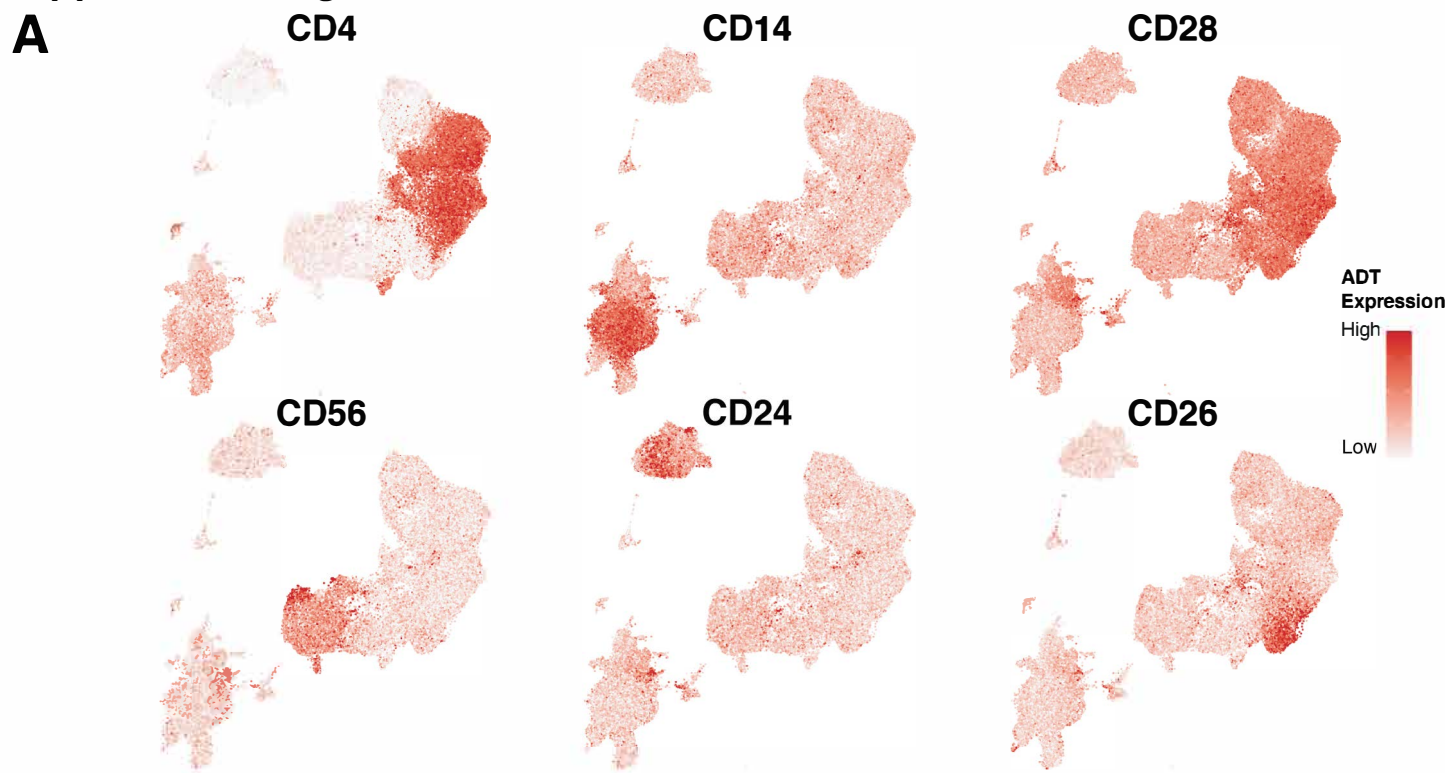

**B**

| Cell type             | Condition   | Anova p-value | post-hoc comparison    | post-hoc p-value |
|-----------------------|-------------|---------------|------------------------|------------------|
| Plasmablasts          | Status      | 0.34769251    | HC vs. Late cv-19      | 0.02834532       |
|                       | Day         | 0.07240114    | Vax 4w vs. Late cv-19  | 0.03152678       |
|                       |             |               | Vax 5w vs. Late cv-19  | 0.04662253       |
| Naive CD8+ T          | Status      | 0.001509515   | HC vs. Early cv-19     | 0.039123554      |
|                       | Day         | 0.038216514   | HC vs. Late cv-19      | 0.004735325      |
|                       |             |               | HC vs. Conv cv-19      | 0.009099227      |
|                       |             |               | Vax 1w vs. Early cv-19 | 0.009109753      |
|                       |             |               | Vax 1w vs. Late cv-19  | 0.00112341       |
|                       |             |               | Vax 1w vs. Conv cv-19  | 0.002137638      |
|                       |             |               | Vax 2w vs. Early cv-19 | 0.011224546      |
|                       |             |               | Vax 2w vs. Late cv-19  | 0.00151102       |
|                       |             |               | Vax 2w vs. Conv cv-19  | 0.002826216      |
|                       |             |               | Vax 3w vs. Vax 5w      | 0.04686929       |
|                       |             |               | Vax 3w vs. Early cv-19 | 0.003668038      |
|                       |             |               | Vax 3w vs. Late cv-19  | 0.000476355      |
|                       |             |               | Vax 3w vs. Conv cv-19  | 0.00088898       |
|                       |             |               | Vax 4w vs. Early cv-19 | 0.044269754      |
|                       |             |               | Vax 4w vs. Late cv-19  | 0.005262563      |
| Vax 4w vs. Conv cv-19 | 0.010252161 |               |                        |                  |
| Vax 5w vs. Late cv-19 | 0.034366136 |               |                        |                  |

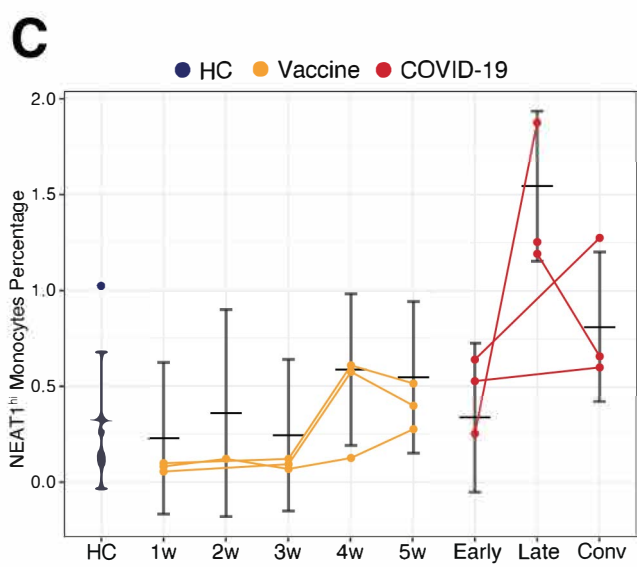

| Cell type                    | Condition | Anova p-value | post-hoc comparison        | post-hoc p-value |
|------------------------------|-----------|---------------|----------------------------|------------------|
| NEAT <sup>hi</sup> Monocytes | Status    | 0.128441935   | HC vs. Late cv-19          | 0.005489572      |
|                              | Day       | 0.005722313   | Vax 1w vs. Late cv-19      | 0.003875149      |
|                              |           |               | Vax 2w vs. Late cv-19      | 0.030342987      |
|                              |           |               | Vax 3w vs. Late cv-19      | 0.004305727      |
|                              |           |               | Vax 4w vs. Late cv-19      | 0.0436813        |
|                              |           |               | Vax 5w vs. Late cv-19      | 0.033299001      |
|                              |           |               | Early cv-19 vs. Late cv-19 | 0.001168121      |

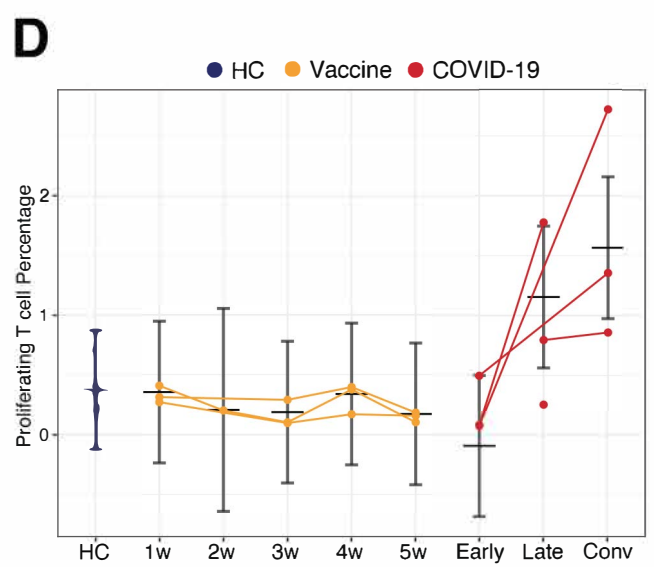

| Cell type             | Condition | Anova p-value | post-hoc comparison        | post-hoc p-value |
|-----------------------|-----------|---------------|----------------------------|------------------|
| Proliferating T cells | Status    | 0.0102737     | Early cv-19 vs. Late cv-19 | 0.039512949      |
|                       | Day       | 0.01974699    | Early cv-19 vs. Conv cv-19 | 0.002380046      |

# Supplemental Figure 2

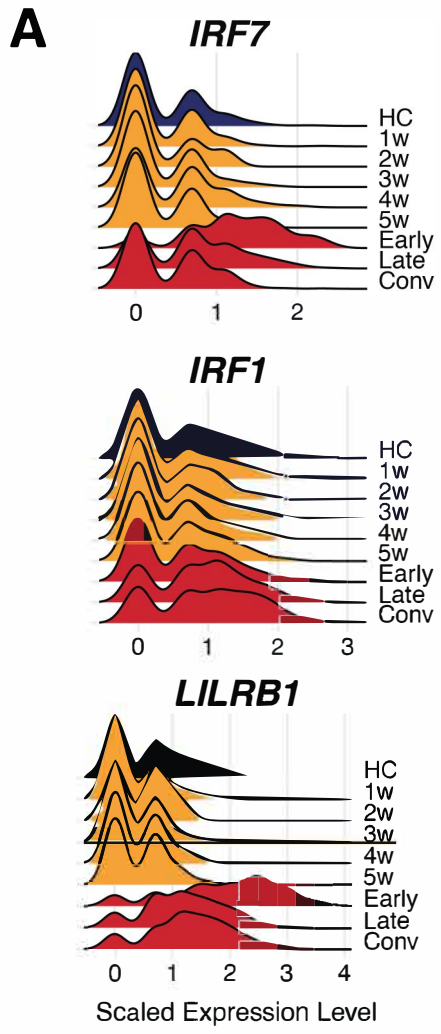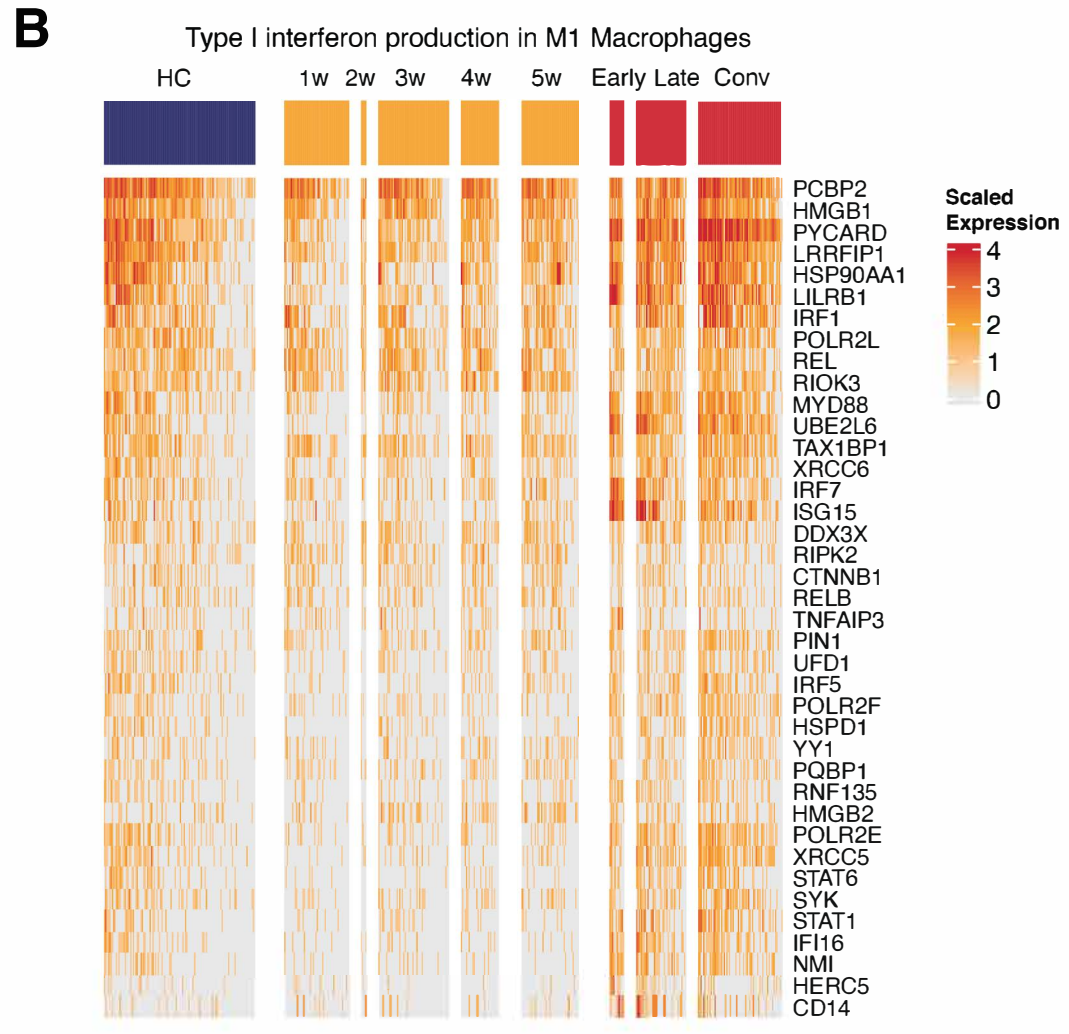

# Supplemental Figure 3

**A**

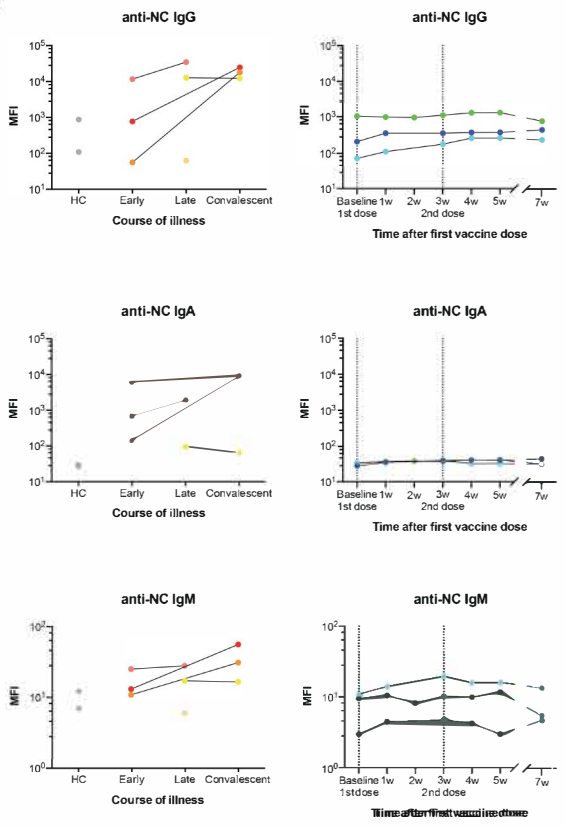

**B**

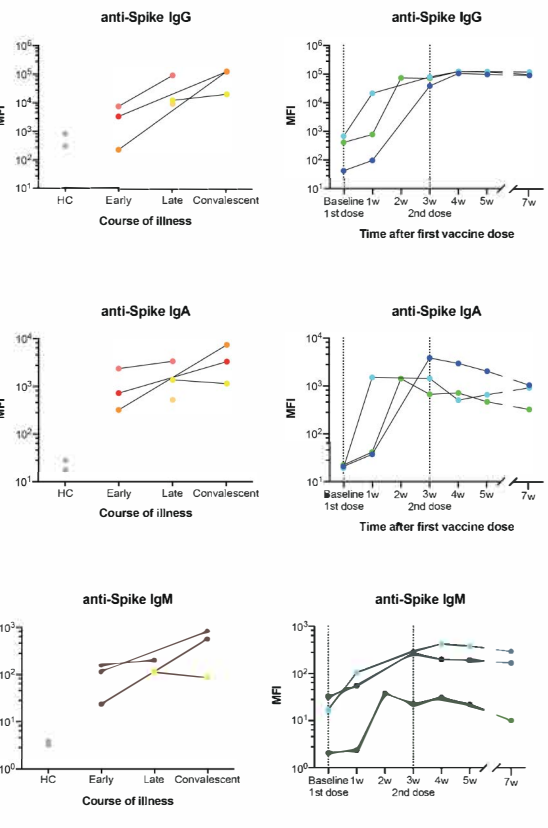

- HC
- SK-007
- SK-008
- Vaccine**
- CV-001
- CV-003
- CV-011
- COVID-19**
- SK-010
- SK-011
- SK-012
- SK-013
- SK-014

**C**

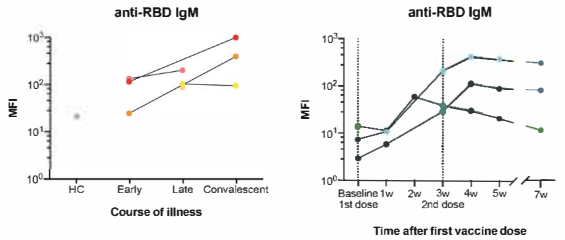

**D**

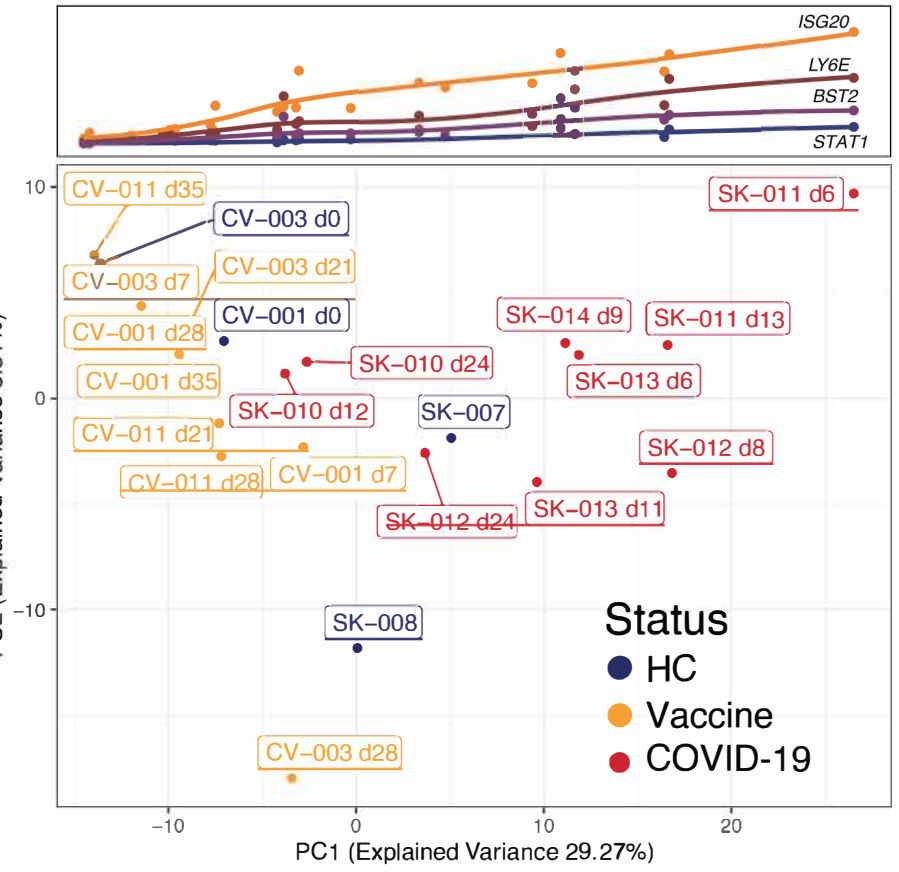

# Supplemental Figure 4

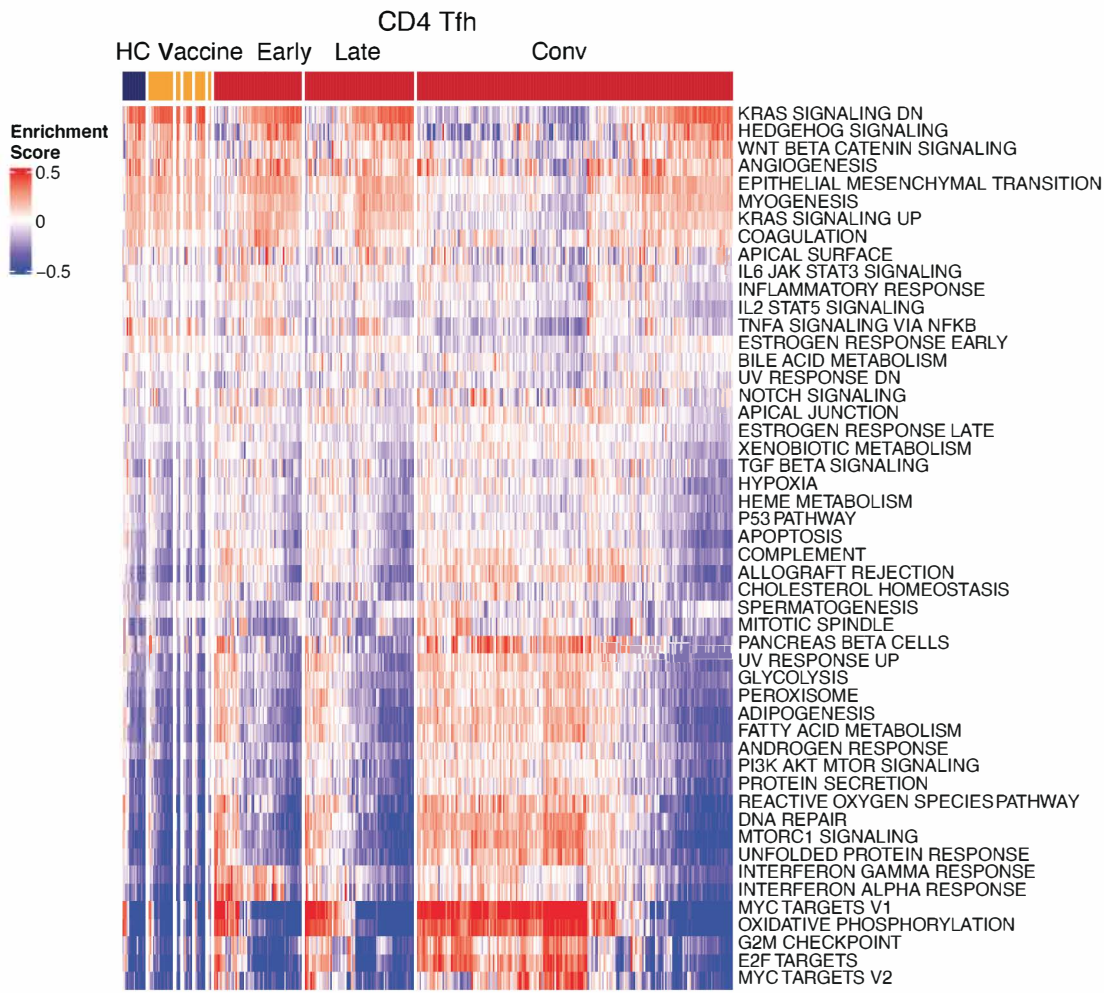

# Supplemental Figure 5

## Cytotoxic Gene Signature

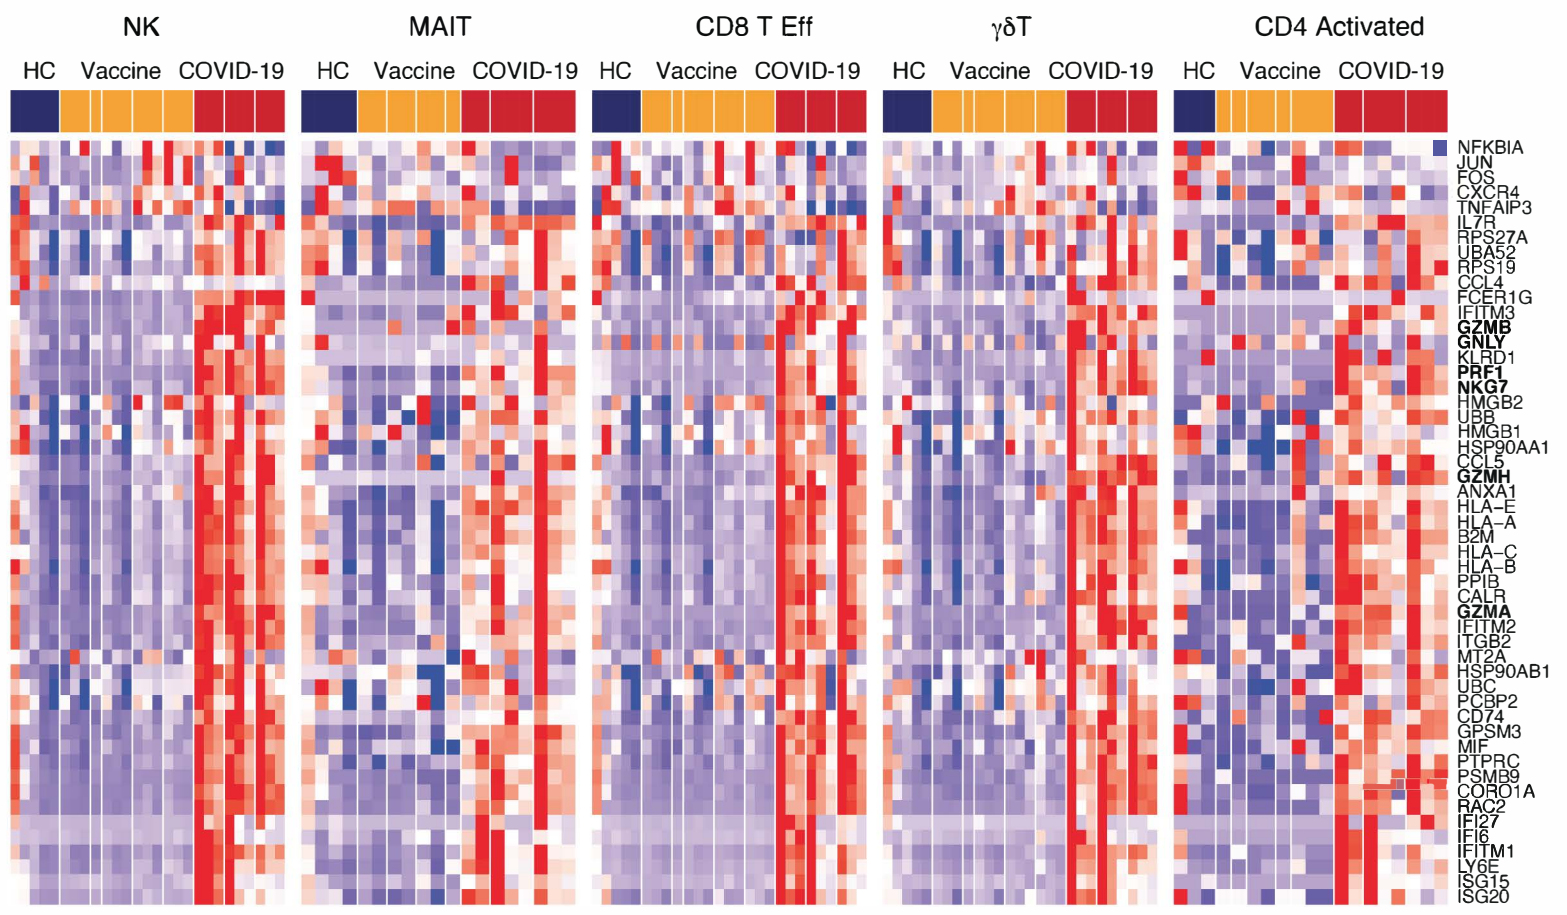

# Supplemental Figure 6

**A**  
CD8 Effector and Memory T cells

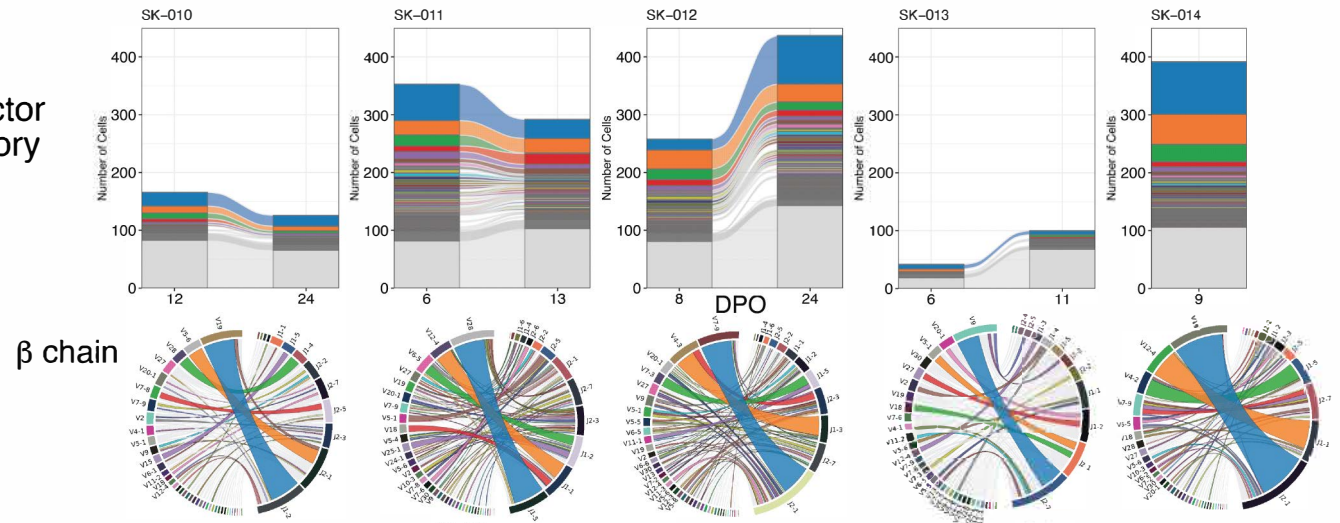

**B**

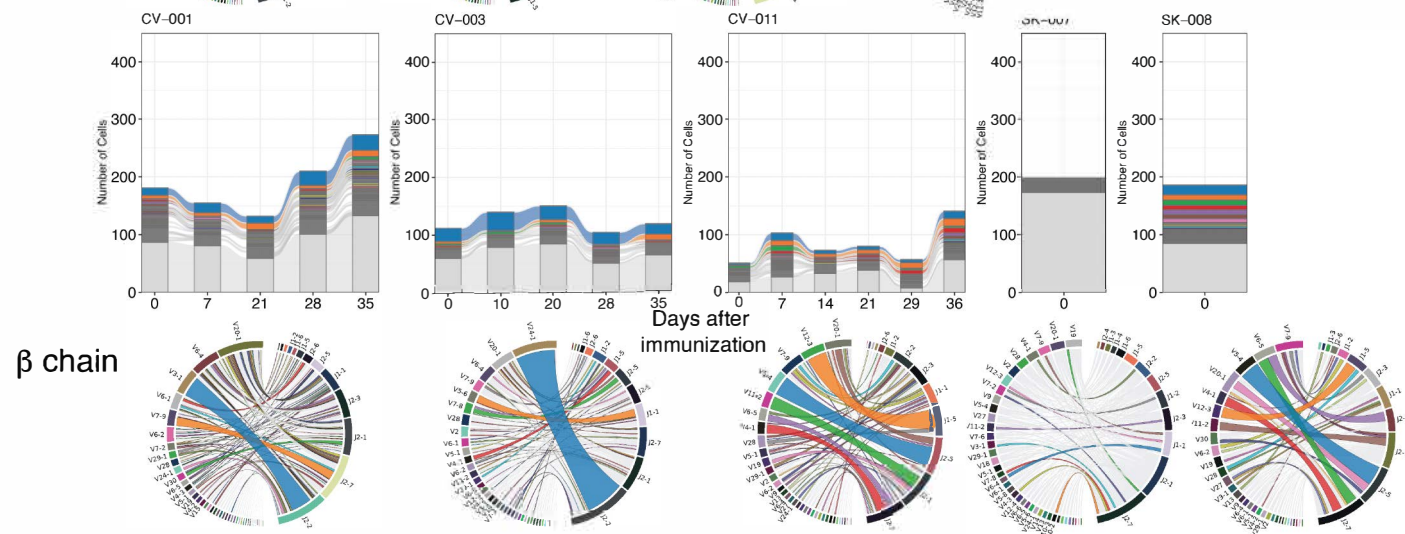

**C**  
 $\gamma\delta$  T cells

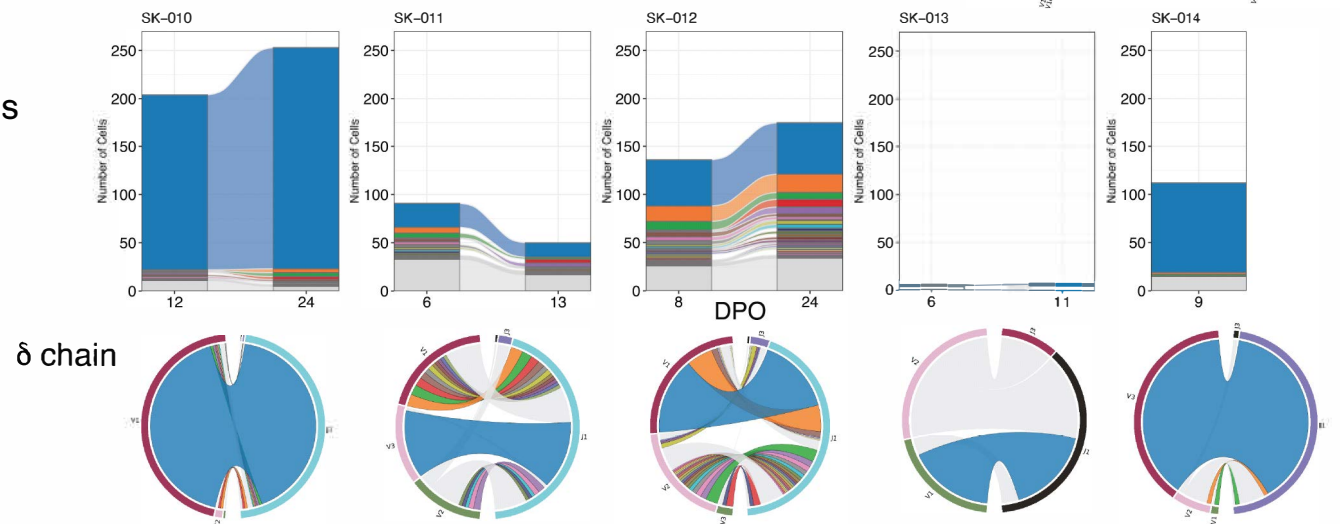

**D**

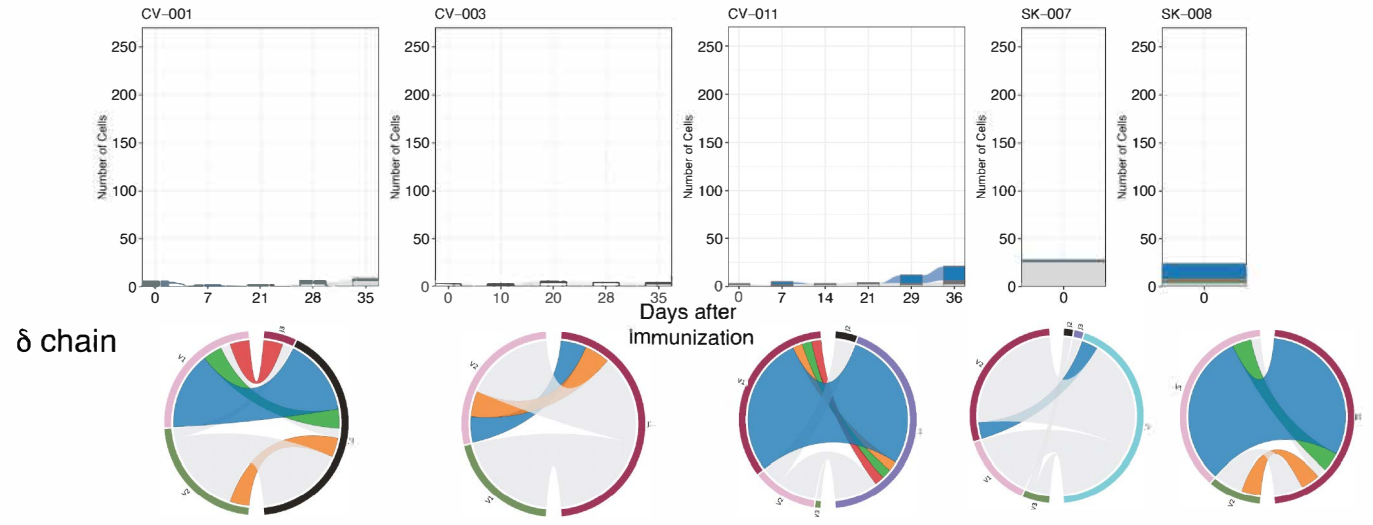

Supplement: Supplementary file [file media-1.pdf]
