# Supplementary material for: mRNA COVID-19 vaccine elicits potent adaptive immune response without the persistent inflammation seen in SARS-CoV-2 infection
Source: bioRxiv or medRxiv preprint supplement (doi:10.1101/2021.04.20.21255677), 2023-08-23
Supplement: Supplementary file [file media-1.pdf]

| Participant | Cohort         | Age   | Sex    | Race             | BMI  | Days post onset symptoms or days since first vaccine dose |    | Fraction inspired O <sub>2</sub> | Days since booster | WHO COVID severity scale | COVID Outcome                                          | Co-morbidities |
|-------------|----------------|-------|--------|------------------|------|-----------------------------------------------------------|----|----------------------------------|--------------------|--------------------------|--------------------------------------------------------|----------------|
|             |                |       |        |                  |      |                                                           |    |                                  |                    |                          |                                                        |                |
| SK-010      | Acute COVID-19 | 36-40 | Female | Asian            | NA   | 12                                                        | 21 | NA                               | 5                  | Recovered                | NA                                                     |                |
|             |                |       |        |                  |      | 24                                                        | 21 |                                  |                    |                          |                                                        |                |
| SK-011      | Acute COVID-19 | 56-60 | Female | Caucasian        | 35.7 | 6                                                         | 32 | NA                               | 7                  | Recovered                | Type 2 Diabetes, Hypertension, Hyperlipidemia, Obesity |                |
|             |                |       |        |                  |      | 13                                                        | 24 |                                  |                    |                          |                                                        |                |
| SK-012      | Acute COVID-19 | 41-45 | Male   | Caucasian        | 24.7 | 8                                                         | 38 | NA                               | 8                  | Recovered                | Asthma, Anxiety, Depression                            |                |
|             |                |       |        |                  |      | 24                                                        | 38 |                                  |                    |                          |                                                        |                |
| SK-013      | Acute COVID-19 | 61-65 | Male   | NA               | NA   | 6                                                         | 38 | NA                               | 5                  | Recovered                | NA                                                     |                |
|             |                |       |        |                  |      | 11                                                        | 28 |                                  |                    |                          |                                                        |                |
| SK-014      | Acute COVID-19 | 51-55 | Female | Asian            | NA   | 9                                                         | 21 | NA                               | 5                  | Recovered                | NA                                                     |                |
| CV-001      | mRNA vaccine   | 36-40 | Male   | Asian            | 28.4 | 0, 7, 14, 21, 28, 35                                      | 21 | 0, 7, 28                         | NA                 | NA                       | NA                                                     |                |
| CV-003      | mRNA vaccine   | 31-35 | Male   | Asian            | 27.9 | 0, 10, 20, 28, 35                                         | 21 | 0, 7, 28                         | NA                 | NA                       | Hypothyroidism                                         |                |
| CV-011      | mRNA vaccine   | 36-40 | Male   | Caucasian        | 28.6 | 0, 7, 14, 21, 29, 36                                      | 21 | 0, 7                             | NA                 | NA                       | NA                                                     |                |
| CV-012      | mRNA vaccine   | 51-55 | Female | Caucasian        | 28.7 | 0, 7, 21, 28                                              | 21 | NA                               | NA                 | NA                       | NA                                                     |                |
| CV-022      | mRNA vaccine   | 41-45 | Male   | Caucasian        | 22.4 | 0, 7, 21, 28                                              | 21 | NA                               | NA                 | NA                       | Facial Cellulitis, GERD                                |                |
| CV-053      | mRNA vaccine   | 46-50 | Female | African-American | NA   | 0, 7, 21, 28                                              | 21 | NA                               | NA                 | NA                       | Fibroids, HSV, GERD                                    |                |
| CV-056      | mRNA vaccine   | 51-55 | Female | Caucasian        | 25.4 | 0, 7, 21, 28                                              | 21 | NA                               | NA                 | NA                       | NA                                                     |                |
| SK-007      | HC             | 36-40 | Female | Caucasian        | 20.4 | 0                                                         | 21 | NA                               | NA                 | NA                       | NA                                                     |                |
| SK-008      | HC             | 36-40 | Female | Caucasian        | 28.6 | 0                                                         | 21 | NA                               | NA                 | NA                       | NA                                                     |                |

**Supplemental Table 1. Demographic characteristics, clinical features, and outcomes for study participants.**
