# Supplementary material for: mRNA COVID-19 vaccine elicits potent adaptive immune response without the persistent inflammation seen in SARS-CoV-2 infection
Source: bioRxiv or medRxiv preprint supplement (doi:10.1101/2021.04.20.21255677), 2023-08-23
Supplement: Supplementary file [file media-2.pdf]

| Participant | Cohort         | Age   | Sex    | Days post onset symptoms or days since first vaccine dose | Fraction inspired O <sub>2</sub> | WHO COVID severity scale | COVID Outcome |
|-------------|----------------|-------|--------|-----------------------------------------------------------|----------------------------------|--------------------------|---------------|
| SK-010      | Acute COVID-19 | 35-40 | Female | 12                                                        | 21                               | 5                        | Recovered     |
|             |                |       |        | 24                                                        | 21                               |                          |               |
| SK-011      | Acute COVID-19 | 55-60 | Female | 6                                                         | 32                               | 7                        | Recovered     |
|             |                |       |        | 13                                                        | 24                               |                          |               |
| SK-012      | Acute COVID-19 | 45-50 | Male   | 8                                                         | 38                               | 8                        | Recovered     |
|             |                |       |        | 24                                                        | 38                               |                          |               |
| SK-013      | Acute COVID-19 | 60-65 | Male   | 6                                                         | 38                               | 5                        | Recovered     |
|             |                |       |        | 11                                                        | 28                               |                          |               |
| SK-014      | Acute COVID-19 | 55-60 | Female | 9                                                         | 36                               | 5                        | Recovered     |
| SK-007      | Healthy        | 35-40 | Female | NA                                                        | 21                               | NA                       | NA            |
| SK-008      | Healthy        | 35-40 | Male   | NA                                                        | 21                               | NA                       | NA            |
| CV-001      | mRNA vaccine   | 35-40 | Male   | 0, 7, 21, 28, 35, 54                                      | 21                               | NA                       | NA            |
| CV-003      | mRNA vaccine   | 30-35 | Male   | 0, 10, 20, 28, 35, 52                                     | 21                               | NA                       | NA            |
| CV-011      | mRNA vaccine   | 35-40 | Male   | 0, 7, 14, 21, 29, 36, 50                                  | 21                               | NA                       | NA            |
