# Supplementary material for: mRNA COVID-19 vaccine elicits potent adaptive immune response without the persistent inflammation seen in SARS-CoV-2 infection
Source: bioRxiv or medRxiv preprint supplement (doi:10.1101/2021.04.20.21255677), 2023-08-23
Supplement: Supplementary file [file media-2.pdf]

# Supplemental Figure 1

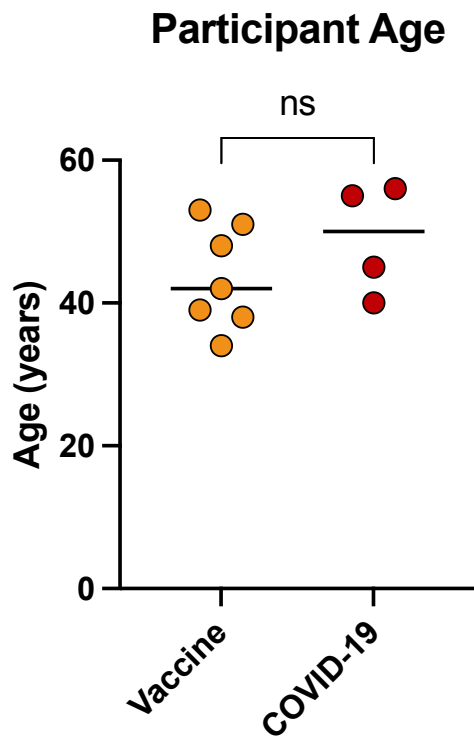

## Supplemental Figure 1. Participant age.

Scatter plot of age for all healthy volunteers who received SARS-CoV2 vaccine and COVID-19 patients in **Supplemental Table 1**. P-value were determined by Welch's t-test (\*  $p < 0.05$ , \*\*  $p < 0.01$ , \*\*\*  $p < 0.001$ ).
