# Supplementary material for: mRNA COVID-19 vaccine elicits potent adaptive immune response without the persistent inflammation seen in SARS-CoV-2 infection
Source: bioRxiv or medRxiv preprint supplement (doi:10.1101/2021.04.20.21255677), 2023-08-23
Supplement: Supplementary file [file media-4.pdf]

| Cell Population | Subpopulation                 | Markers                                                           |
|-----------------|-------------------------------|-------------------------------------------------------------------|
| B cells         | Memory                        | MS4A1, COCH, AIM2, BANK1, CD79A                                   |
|                 | Resting                       | IL4R, CXCR4, BTG1, TCL1A, YBX3                                    |
|                 | Plasmablasts                  | MZB1, TNFRSF17, CPNE5, POU2AF1                                    |
|                 | Activated                     | FOSB, CD196 (ADT)                                                 |
| T cells         | T Proliferating               | MKI67, TOP2A, PCLAF, TYMS, RRM2                                   |
|                 | CD4 T CM                      | CD4, TCF7, IL7R                                                   |
|                 | CD4 T Regulatory              | CD4, CTLA4, FOXP3, IL2RA                                          |
|                 | CD4 Activated                 | CD4, CCL5, FYB1, GZMK, IL32, TRAC, KLRB, GZMA, ZEB2               |
|                 | CD8 Naïve                     | CCR7, CD8A, CD8B                                                  |
|                 | CD8 EM                        | CD8A, CD28, CD127, CD45RO, CCL5, NKG7                             |
| T innate cells  | MAIT                          | TRAV1-2, SLC4A10, KLRB1, GZMK, IL7R, SLC4A10, CXCR6, CD45RO (ADT) |
|                 | NK                            | GNLY, TYROBP, NKG7, FGFBP2, KLRF1                                 |
|                 | $\gamma\delta$ T              | TRDC, TRGC2, KLRC1, NKG7, TRDV2, TRGV9, KLRG1                     |
|                 | NK Proliferating              | GNLY, NKG7, MKI67, TOP2A, STMN1, TYMS                             |
| Myeloid cells   | pDC                           | CLEC4C, IL3RA                                                     |
|                 | Classical Monocytes           | CD14, LYZ, CD36                                                   |
|                 | NKG7 <sup>+</sup> Monocytes   | LYZ, NKG7, GNLY                                                   |
|                 | Non-classical monocytes       | FCGR3A, MS4A7, CDKN1C                                             |
|                 | NEAT1 <sup>hi</sup> Monocytes | CD14, NEAT1                                                       |

**Supplemental table 2. Markers used to delineate immune cell subsets.**
