# Supplementary material for: mRNA COVID-19 vaccine elicits potent adaptive immune response without the persistent inflammation seen in SARS-CoV-2 infection
Source: bioRxiv or medRxiv preprint supplement (doi:10.1101/2021.04.20.21255677), 2023-08-23
Supplement: Supplementary file [file media-5.pdf]

# Supplemental Figure 3

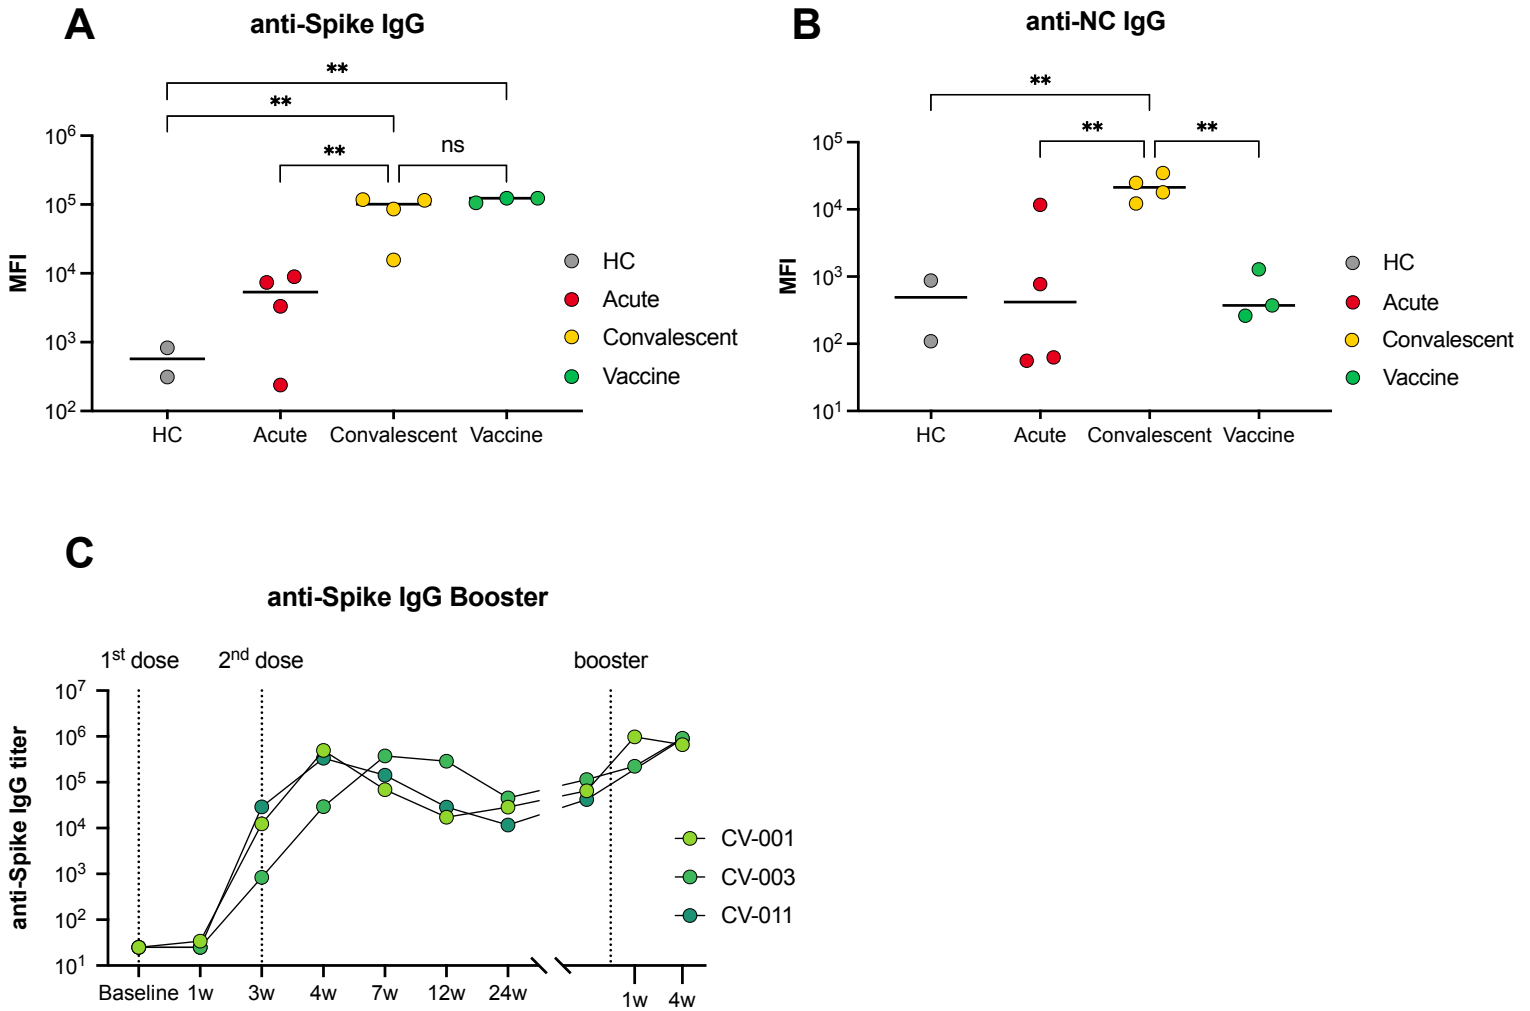

## Supplemental Figure 3. Ab titers and plasmablast responses

**A-B.** SARS-CoV-2-specific Ab titers were assessed for COVID-19 patients and healthy volunteers using Multiplex Bead Binding Assay (MBBA). IgG anti-Spike responses are shown in **(A)**, anti-NC responses in **(B)**. COVID-19 patient samples are split by days post-onset (DPO) of symptoms into acute ( $\leq 10$  DPO) and convalescent ( $> 10$  DPO). For the vaccine group, samples collected 4 weeks post-first vaccine dose were used. P-value were determined by Welch's t-test (\*  $p < 0.05$ , \*\*  $p < 0.01$ , \*\*\*  $p < 0.001$ ).

**C.** Spike-specific Ab titers for 3 healthy volunteers before and after receiving the BNT162b2 mRNA vaccine and booster, assessed by direct ELISA.
