# Supplementary material for: mRNA COVID-19 vaccine elicits potent adaptive immune response without the persistent inflammation seen in SARS-CoV-2 infection
Source: bioRxiv or medRxiv preprint supplement (doi:10.1101/2021.04.20.21255677), 2023-08-23
Supplement: Supplementary file [file media-6.pdf]

## Supplemental Figure 4

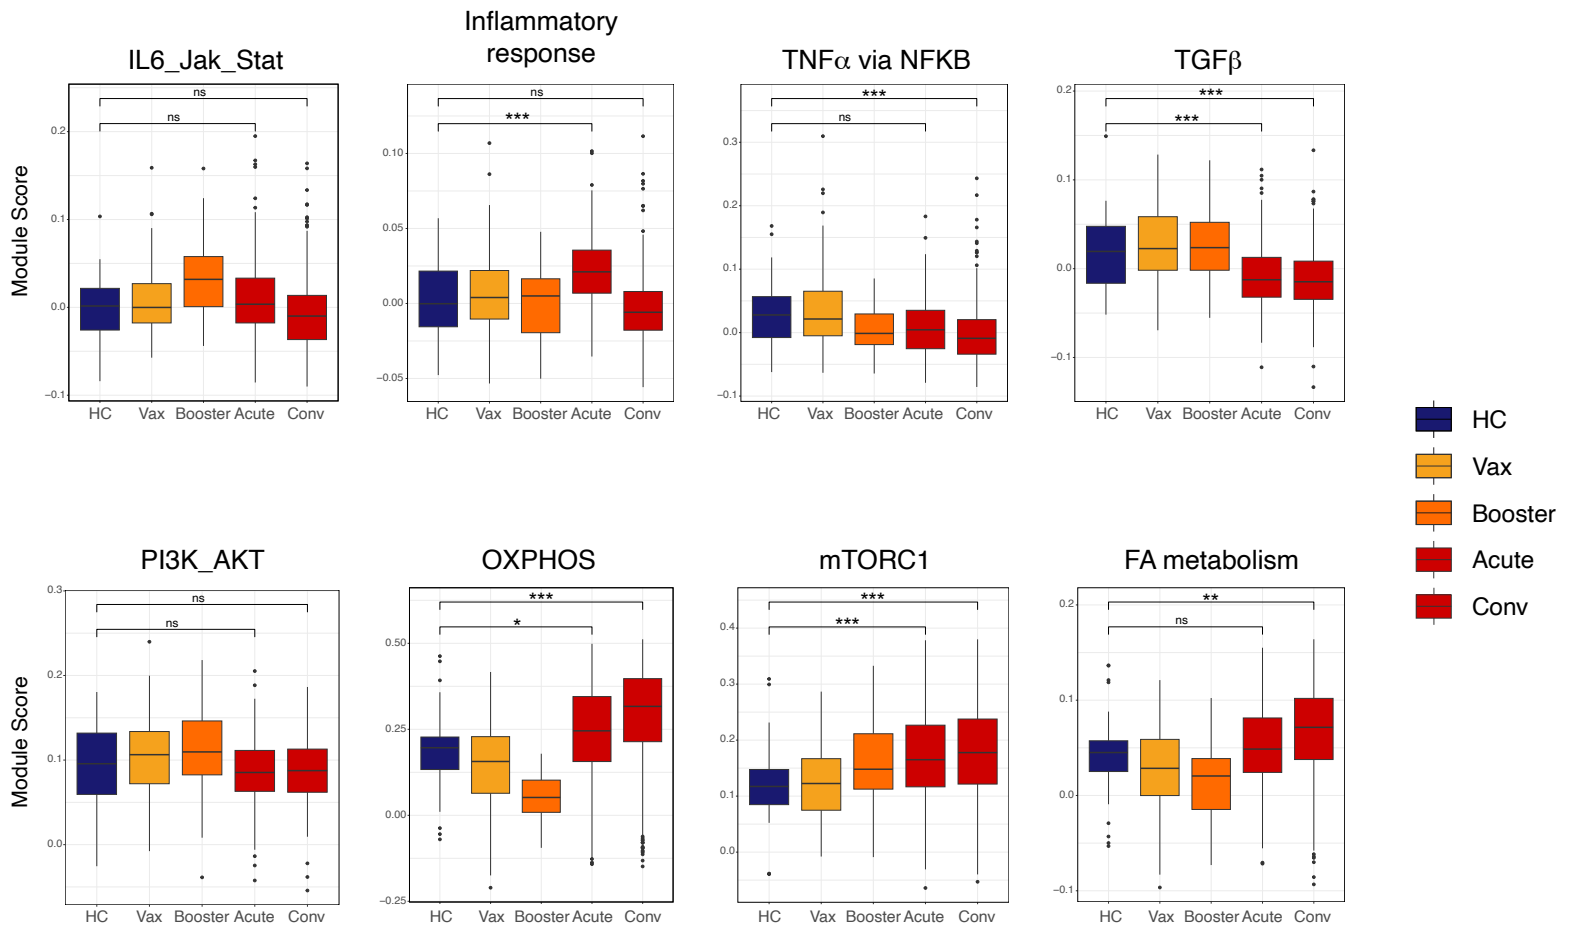

### Supplemental Figure 4. Pathway enrichment in plasmablasts module score.

Module scores for the pathways in **Fig. 2A** were calculated using the `AddModuleScore` function from the Seurat package, which calculates the mean expression for a set of genes and adjusts for the collective expression of control features. The p-values were computed using the Wilcoxon test to compare the median module scores across a range of conditions (\* p < 0.05, \*\* p < 0.01, \*\*\* p < 0.001).
