# Supplementary material for: mRNA COVID-19 vaccine elicits potent adaptive immune response without the persistent inflammation seen in SARS-CoV-2 infection
Source: bioRxiv or medRxiv preprint supplement (doi:10.1101/2021.04.20.21255677), 2023-08-23
Supplement: Supplementary file [file media-7.pdf]

## Supplemental Figure 5

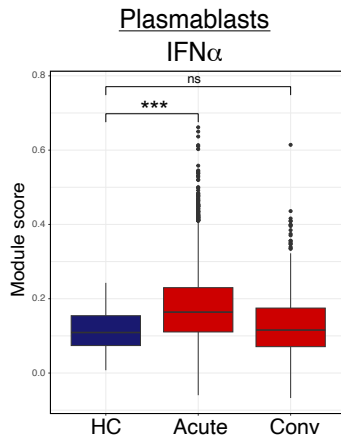

### Supplemental Figure 5. IFN-I gene pathway enrichment in plasmablasts module score in Haniffa data set.

Module scores were calculated for plasmablasts in the Haniffa acute and convalescent COVID-19 samples (Stephenson *et al.*, 2021) using the AddModuleScore function from the Seurat package, which calculates the mean expression for a set of genes and adjusts for the collective expression of control features. The p-values were computed using the Wilcoxon test to compare the median module scores across a range of conditions (\*  $p < 0.05$ , \*\*  $p < 0.01$ , \*\*\*  $p < 0.001$ ).
