# Supplementary material for: mRNA COVID-19 vaccine elicits potent adaptive immune response without the persistent inflammation seen in SARS-CoV-2 infection
Source: bioRxiv or medRxiv preprint supplement (doi:10.1101/2021.04.20.21255677), 2023-08-23
Supplement: Supplementary file [file media-9.pdf]

## Supplemental Figure 7

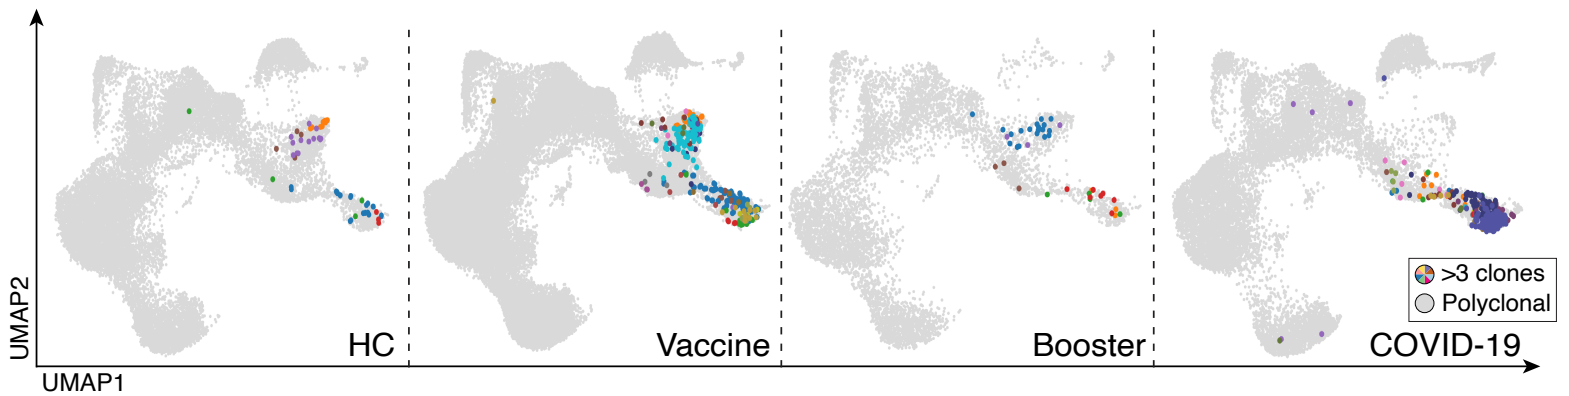

### Supplemental Figure 7. SARS-CoV-2 reactive CD8 T cell clones.

UMAP visualization of CD8 T cell clones that match reported TCR $\beta$  sequences from natural and synthetic exposure to SARS-CoV-2. Since clusters CD8 T Effector Memory and CD4 T Activated overlap in UMAP space, we confirmed that all clonal cells were from the CD8 T Effector Memory population. At a 100% sequence identity threshold, clonal TCRab CDR3 amino acid sequences were compared to CDR3 sequences from spike-specific T cell clones using the cd-hit-2d command from the CD-HIT package. Identical CDR3 sequences in at least 3 cells that had matches to CDR3s in the AIM assay are colored uniquely.
