# Supplementary material for: mRNA COVID-19 vaccine elicits potent adaptive immune response without the persistent inflammation seen in SARS-CoV-2 infection
Source: bioRxiv or medRxiv preprint supplement (doi:10.1101/2021.04.20.21255677), 2023-08-23
Supplement: Supplementary file [file media-10.pdf]

## Supplemental Figure 8

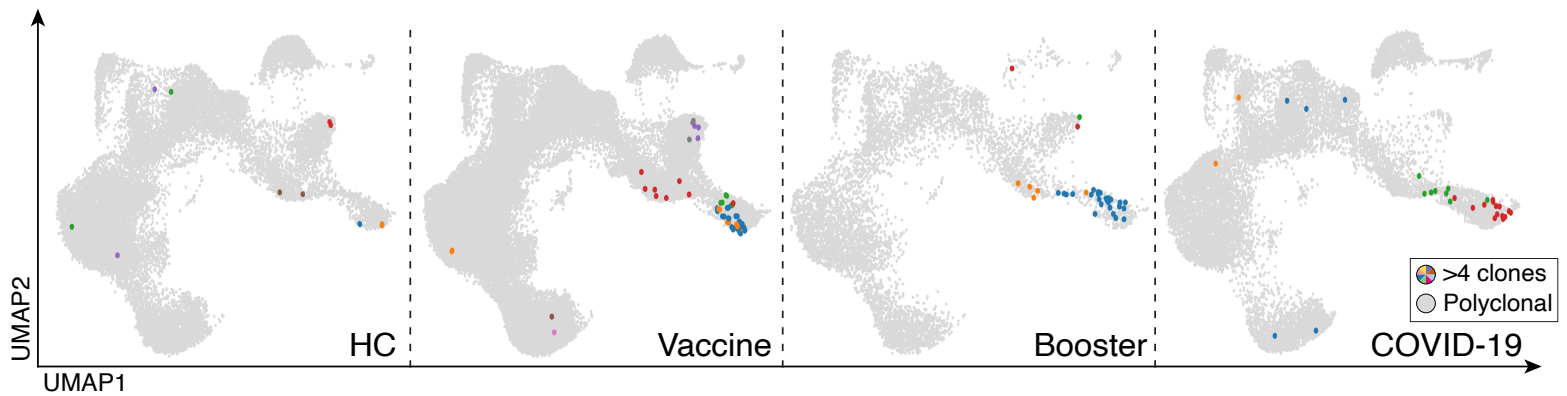

### Supplemental Figure 7. SARS-CoV-2 reactive CD4 T cell clones.

UMAP visualization of T cells expressing TCRs with CDR3 sequences found in SARS-CoV-2 reactive T cells in antigen-induced activation (AIM) assay using Spike peptides. At a 95% sequence identity threshold, clonal TCRab CDR3 amino acid sequences were compared to CDR3 sequences from spike-specific T cell clones using the `cd-hit-2d` command from the CD-HIT package. Identical CDR3 sequences in at least 4 cells that had matches to CDR3s in the AIM assay are colored uniquely.
