# Supplementary material for: mRNA COVID-19 vaccine elicits potent adaptive immune response without the persistent inflammation seen in SARS-CoV-2 infection
Source: bioRxiv or medRxiv preprint supplement (doi:10.1101/2021.04.20.21255677), 2023-08-23
Supplement: Supplementary file [file media-11.pdf]

## Supplemental Figure 9

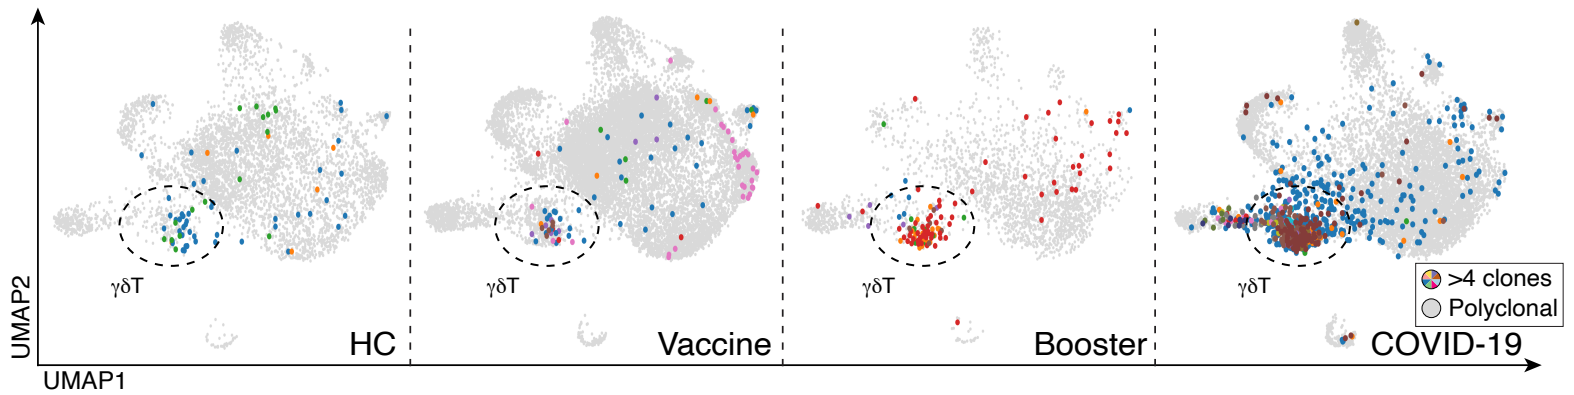

### Supplemental Figure 9. Clonality of $\gamma\delta$ T cell.

UMAP visualization of clonal  $\gamma\delta$ T cells from healthy volunteers before (first panel) and after (second panel) receiving the BNT162b2 mRNA vaccine and booster (third panel), and COVID-19 patients (fourth panel).

Clonality is determined by the CDR3 sequence in TCR $\delta$  chain. Identical CDR3 sequences in at least 5 cells are colored uniquely.
